# Supplementary material for: Irisin Is Controlled by Farnesoid X Receptor and Regulates Cholesterol Homeostasis
Source: PubMed Central journal article supplement (PMC6546903; doi:10.3389/fphar.2019.00548), 2019-05-28
Supplement: Image_1.pdf [file Image_1.pdf]

## supplementary Fig.1

### The IR-1 promoter sequence within the FNDC5 gene

5'-GGCTATAAAAAGGAAACTTCCTATTCTAAATGGGTACCCGGGGCTGGCTTGGGCACCTGCAGCCTG  
AGTTAGGTGCTGAGACTCTGGACACGCAGGAGGGTCCAAATGCTGGTGACCCCATAGGTGTCAATGT  
GTAAGTGACCGGCCAGCCCTCAAGGGGGTCTCTGTGGAGTCCTCCAAATGAAGCCAGTGAGTGCAGC  
TTGGGAGGACAGAGGGCGCACCCCTTAGTCCCTACCCAGGTCTCATGGTTTCACTCATTCTTTCAGTCT  
GTGTTTCCAGAATATTACACAGGGCCTGGTCCATAATAGGTGCTCAATAAACATATGATGGAAGAATG  
ATTTTTTTTCCATACAGTCAACAATCATTTAATGAGCCCCAACTGCATCGTAAGCCTTGCGCTAAGGGA  
TGGGGTACATAAAGTGGCTGGGTTTTTTTTGAGATGGAGTCTTCTCTGTCACCCAGGCTGGAATGCAGT  
GGTGTGCTCAGTCACTGAAACCTCTGCATCCCAGGTTCAAATGATTCTCATGCCTCAGCCTCCAGAGT  
AGCTGGGATTACAGGCACACACCACCATGCCCGGCTAATTTTGTATTTTTAGTAGAGACGGGGTTTCA  
CCATGTTGGCCAGGCTGGTCTCGAACTCCTGACCTC**AGGTGATCCACC**ACCTCGGACTCCCACAGTGC  
TGGGATTACAGGCGTGAGCCAGCGCCCTGGCCTGCAGTGGCTGCTTCTGACAGCTCCCTCCCAAGTTC  
ACCCAGGGCTCCACTAAATCCTCCCAGCCAGCTCTCACTGGCTGCCAGATTCCAGGCACCAGGGCTTT  
CCCCAGAATTAAGGCCCAAGCACCCATGCATCATGAGGACTGAGAAGGCTGTACCCCCACAGTCAC  
AACTCTCCAAATCCTCCAAGCCCCCTCCTTCAGCCGCCTTCTCTCTCAAGCCCTCAGGCACTGCCATCT  
CCTCCCTCCCAATGCCCTACATCTATCTAGGTTTTACCCAAAGAGGCCAGCAGATGGCGCCAAGGTTCC  
CCTTCCCCAGCGCTGGACTGGAGGCCAAGACCCACCAGGACCCTCCCTCCTTTTCTCCCTGCAGGG  
ACGGGAGTAGATTCTGTGTCTCTAACTGAACCCTCTCCTTCCTGCTGGTTCCT-3'
