# Supplementary material for: Irisin Is Controlled by Farnesoid X Receptor and Regulates Cholesterol Homeostasis
Source: PubMed Central journal article supplement (PMC6546903; doi:10.3389/fphar.2019.00548), 2019-05-28
Supplement: Table_1.pdf [file Table_1.pdf]

**supplementary Table 1****Table 1 The primers for RT -PCR**

| Genes   | Sense                         | anti-sense                   |
|---------|-------------------------------|------------------------------|
| Cyp2b10 | 5'-TCGTTGAGCCAACCTTCA-3'      | 5'-ACTCCTCTTTCCCATCCC-3'     |
| FNDC5   | 5'-AAGCACAAGGACTGACTCAAGC-3'  | 5'-CATGTCCTTGATGGCTGGAT-3'   |
| Abcg5   | 5'-TCAATGAGTTTTACGGCCTGAA-3'  | 5'-GCACATCGGGTGATTTAGCA-3'   |
| Abcg8   | 5'-TGCCACCTTCCACATGTC-3'      | 5'-ATGAAGCCGGCAGTAAGGTAGA-3' |
| Abca1   | 5'-TCCTCATCCTCGTCATTCAAA-3'   | 5'-GGACTTGGTAGGACGGAACCT-3'  |
| Cyp7a1  | 5'-AGCAACTAAACAACCTGCCAGTA-3' | 5'-GTCCGGATATTCAAGGATGCA-3'  |
| Cyp8b1  | 5'-AGTGCCCTGAAACACACTCC-3'    | 5'-TCCTCCTGTACCACCCTGAG-3"   |
| Shp     | 5'-CTCATGGCCTCTACCCTCAA-3'    | 5'-GGTCACCTCAGCAAAAGCAT-3'   |
| ApoA-I  | 5'- TGTGTATGTGGATGCGGTCA-3'   | 5'- ATCCCAGAAGTCCCGAGTCA-3'  |
| Abca1   | 5'- TCCTCATCCTCGTCATTCAAA-3'  | 5'- GGACTTGGTAGGACGGAACCT-3' |
| Abcg1   | 5'- CTCCGGCTTCCTCTTCTTCT-3'   | 5'- TACACGATGCTGCAGTAGGC-3'  |
| 18S     | 5'-TTGACTCAACACGGGAAACC-3'    | 5'-AGACAAATCGCTCCACCAAC-3'   |
